# Supplementary material for: Homo- and heteroalumoxane silicates
Source: Royal Society of Chemistry journal article supplement (doi:10.1039/c5ra18481a), 2015-01-01
Supplement: c5ra18481a1.pdf [file c5ra18481a1.pdf]

Supporting Information

for

**Homo- and heteroalumoxane silicates.**

Jessica García-Ríos,<sup>a,b</sup> René Francisco Hernández-Campos,<sup>a,b</sup> Fernando Rascón-Cruz,<sup>c,†</sup> Víctor Augusto Moreno-Martínez,<sup>a</sup> Raúl Huerta-Lavorie,<sup>c,§</sup> Miguel-Ángel Velázquez-Carmona,<sup>a</sup> Raymundo Cea-Olivares,<sup>c</sup> Diego Martínez-Otero<sup>a</sup> and Vojtech Jancik,<sup>a,c,\*</sup>

<sup>a</sup>*Centro Conjunto de Investigación en Química Sustentable UAEM-UNAM, Carr. Toluca-Atacomulco km 14.5, 50200 Toluca, Estado de México, México.*

<sup>b</sup>*Universidad del Valle de México, Campus Toluca, Avenida Las Palmas No. 439 Poniente, Col. San Jorge Pueblo Nuevo, 52164 Metepec, Estado de México, México.*

<sup>c</sup>*Instituto de Química, Universidad Nacional Autónoma de México, Circuito Exterior s/n, Ciudad Universitaria, Col. Universidad Nacional Autónoma de México C.U., 04510, México, D.F., México.*

<sup>†</sup>*Currently at ExxonMobil Chemical Europe, Inc., Hermeslaan 2, B-1831 Machelen, Belgium.*

<sup>§</sup>*Currently at Instituto de Investigaciones en Materiales, Universidad Nacional Autónoma de México, Circuito Exterior s/n, Ciudad Universitaria, Col. Universidad Nacional Autónoma de México C.U., 04510, México, D.F., México.*

*Fax: +52-55-56-16-22-17.*

*E-mail: vjancik@unam.mx*

Histogram of the (M)OH...Ga bond lengths reported in the CSD 2015

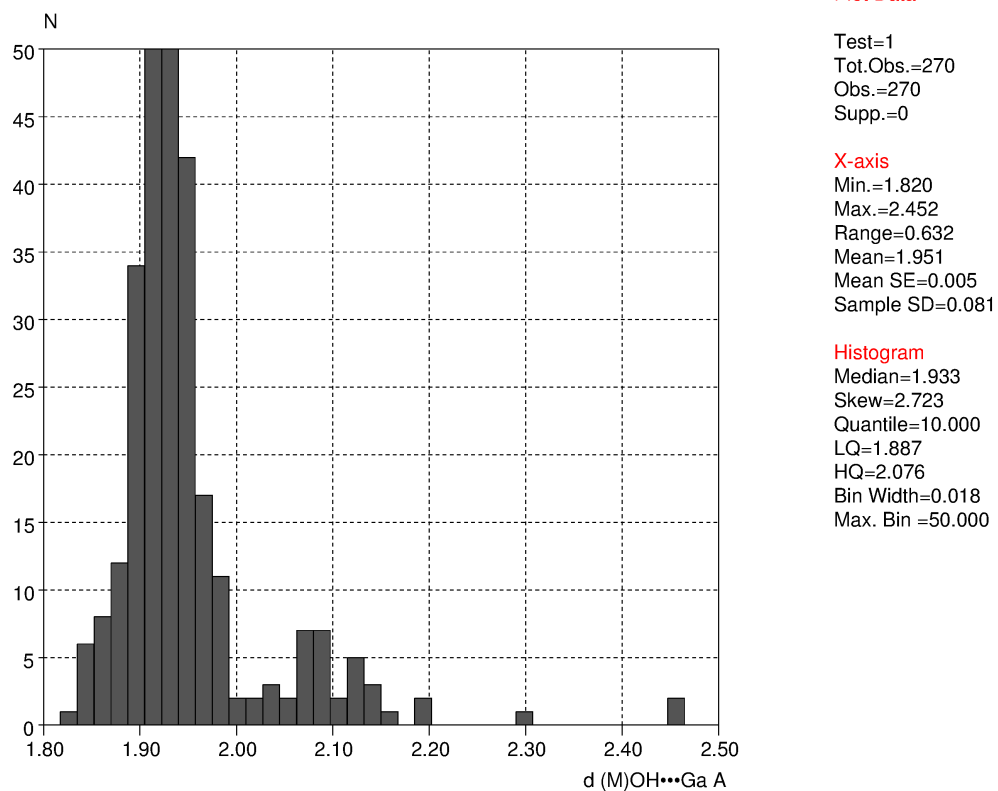

Figure S1: Histogram of the (M)OH...Ga distances reported in the CSD 2015.

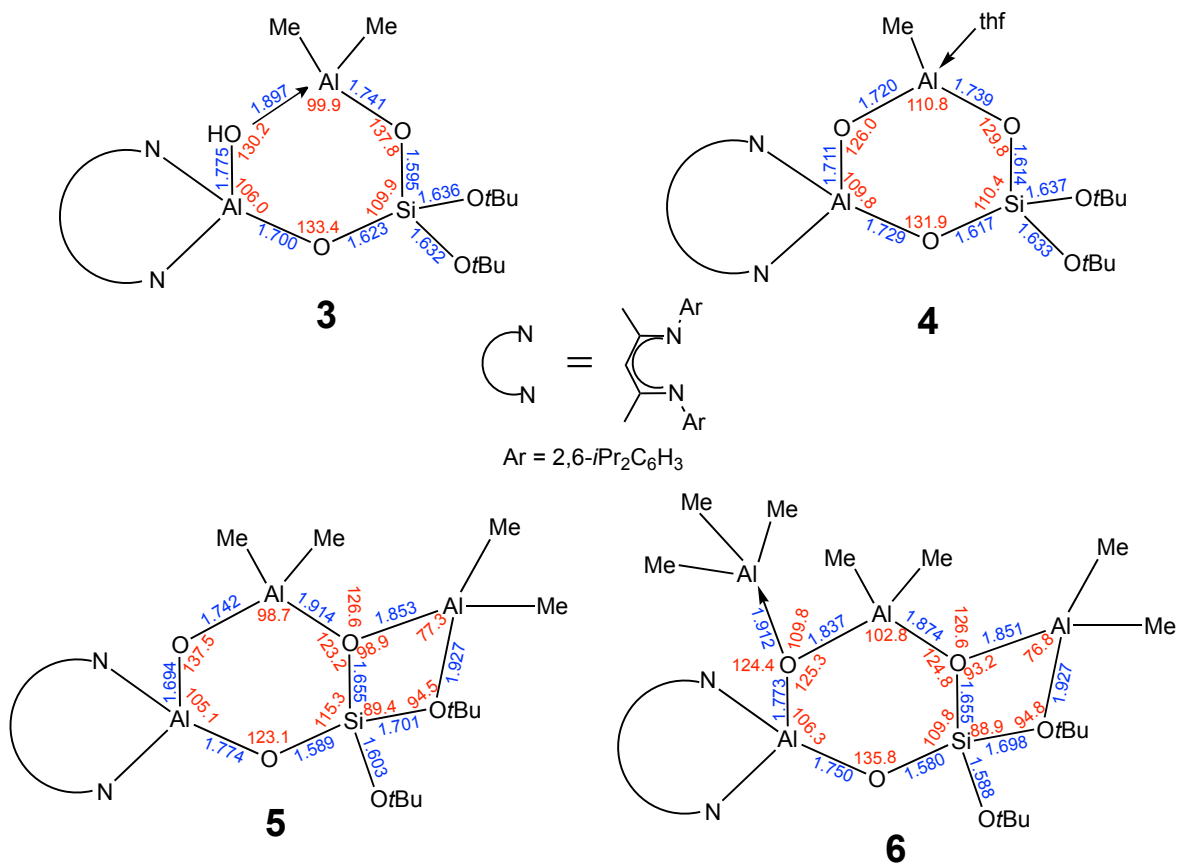

Figure S2: Selected bond lengths (blue values, in Å) and angles (red values, in °) for the inorganic rings in compounds 3–6.
